# Supplementary material for: A novel benzoxazinone derivative YLT-LL-11 inhibits diffuse large B-cell lymphoma growth via inducing cell cycle arrest and apoptosis
Source: Oxford University Press journal article supplement (doi:10.1042/bsr20190828), 2019-09-16
Supplement: bsr-2019-0828_supp.pdf [file bsr-2019-0828_supp.pdf]

1    **Supplementary information**

2    **A novel benzoxazinone derivative YLT-LL-11 inhibits diffuse large B-cell**  
3    **lymphoma growth *via* inducing cell cycle arrest and apoptosis**

4    Cuiting Peng<sup>1,3 #</sup>, Changzhen Sun<sup>2, #</sup>, Ningyu Wang<sup>4</sup>, Yuanmin He<sup>1</sup>, Jixiang Xu<sup>1</sup>, Lanyang Gao<sup>5</sup>,  
5    Yongqiong Deng<sup>1</sup>, Jianqiao Zhong<sup>1</sup>, Xia Xiong<sup>1</sup>, Li Liu<sup>1, \*</sup>

6    <sup>1</sup> Department of dermatology, The affiliated hospital of Southwest Medical University, Luzhou,  
7    China.

8    <sup>2</sup> Drug Research Center of Integrated Traditional Chinese and Western Medicine, Affiliated  
9    Traditional Chinese Medicine Hospital, Southwest Medical University, Luzhou, China.

10    <sup>3</sup> Department of Obstetrics& Gynecology, West China Second University Hospital, Sichuan  
11    University, Chengdu, China.

12    <sup>4</sup> School of Life Science and Engineering, Southwest Jiaotong University, Chengdu, China.

13    <sup>5</sup> Department of Science and Technology, The affiliated hospital of Southwest Medical University,  
14    Luzhou, China.

15    <sup>#</sup> These authors contributed equally to this study.

16    <sup>\*</sup> Address correspondence to Li Liu: liuli@swmu.edu.cn

17 The structure of the YLT-LL-11 was characterized by nuclear magnetic resonance  
18 (NMR) and mass spectrometry (MS).

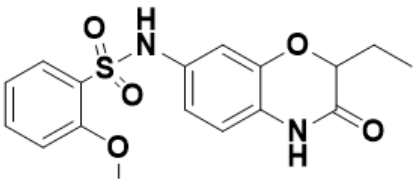

19  
20 <sup>1</sup>H NMR (400 MHz, DMSO-*d*<sub>6</sub>) δ 10.49 (s, 1H), 9.80 (s, 1H), 7.71 (dd, *J* = 7.8, 1.7 Hz, 1H), 7.59 –  
21 7.52 (m, 1H), 7.16 (d, *J* = 8.3 Hz, 1H), 7.01 (t, *J* = 7.6 Hz, 1H), 6.67 (d, *J* = 4.4 Hz, 3H), 4.41 (dd, *J*  
22 = 7.8, 4.5 Hz, 1H), 3.89 (s, 3H), 1.74 (m, *J* = 7.4, 4.5 Hz, 1H), 1.65 (m, *J* = 14.5, 7.4 Hz, 1H), 0.91 (t,  
23 *J* = 7.4 Hz, 3H).  
24 <sup>13</sup>C NMR (101 MHz, DMSO-*d*<sub>6</sub>) δ 166.27, 156.79, 143.01, 135.48, 133.48, 130.75, 126.66, 124.10,  
25 120.51, 115.95, 114.57, 113.22, 109.16, 77.55, 56.54, 23.67, 9.51.  
26 Mass spectrometry (ESI, *m/z*): 361.0869 [M-H]<sup>−</sup>.

27 **Supplementary Table 1 Primers used in real-time PCR**

| Application    | sequences (5' to 3')     |
|----------------|--------------------------|
| c-Myc-forward  | GCCACGTCTCCACACATCAG     |
| c-Myc-reverse  | TCTTGGCAGCAGGATAGTCCTT   |
| BRD4- forward  | ACCTCCAACCCTAACAAGCC     |
| BRD4-reverse   | TTCCATAGTGTCTTGAGCACC    |
| GAPDH- forward | GCGATGCTGGCGCTGAGTACGTCG |
| GAPDH-reverse  | GGGCATCAGCAGAGGGGGCAGAGA |
